# Supplementary material for: Derivative of clove oil used as a chemosensor for the colorimetric and fluorometric detection of Al3+: crystal structure description and live cell imaging
Source: Royal Society of Chemistry journal article supplement (doi:10.1039/d4nj04724a), 2025-01-01
Supplement: d4nj04724a1.pdf [file d4nj04724a1.pdf]

## Supporting information

### **Derivative of clove oil used as chemosensor for colorimetric and fluorometric detection of Al<sup>3+</sup>: crystal structure description and live cell imaging**

**Mohafuza Khatun,<sup>a</sup> Jayanta Mandal,<sup>a</sup> Rajdeep Ganguly,<sup>b</sup> Ananya Barui,<sup>b</sup> Snehasis Banerjee,<sup>c</sup> and Amrita Saha<sup>\*a</sup>**

<sup>a</sup>Department of Chemistry, Jadavpur University, Kolkata- 700032, India.

E-mail: [amritasahachemju@gmail.com](mailto:amritasahachemju@gmail.com); Tel. +91-33-24572146

<sup>b</sup>Centre for Healthcare Science and Technology, Indian Institute of Engineering Science and Technology, Shibpur, P.O. Botanic Garden, Howrah 711103, WB, India.

<sup>c</sup>Department of Chemistry, Hoogly Mohsin College, P.O. Chinsurah, Hoogly 712101, WB, India.

| Serial No. | Content                                                                                                                                                                                                                                                                     | Page No. |
|------------|-----------------------------------------------------------------------------------------------------------------------------------------------------------------------------------------------------------------------------------------------------------------------------|----------|
| 1          | <b>Table S1</b> Crystal parameters and selected refinement details for chemosensor <b>H<sub>3</sub>L</b> .                                                                                                                                                                  | S3       |
| 2          | <b>Table S2</b> Selected bond lengths (Å) and bond angles (°) for chemosensor <b>H<sub>3</sub>L</b> .                                                                                                                                                                       | S4       |
| 3          | <b>Table S3</b> Apparent binding constant (K), LOD, lifetime ( $\tau_f$ ) and quantum yield ( $\Phi$ ) values of <b>H<sub>3</sub>L</b> and complex <b>1</b> from spectrofluorometric measurement.                                                                           | S4       |
| 4          | <b>Table S4</b> First few strong and the lowest-lying absorption and emission band calculated wavelength (nm)/energies (eV), oscillator strength ( $f$ ), major contribution, and the experimental wavelength (nm) for the investigated complex <b>1</b> in methanol media. | S5       |
| 5          | <b>Fig. S1</b> ESI-MS <sup>+</sup> spectrum of [ <b>H<sub>3</sub>L</b> +H] <sup>+</sup> .                                                                                                                                                                                   | S6       |
| 6          | <b>Fig. S2</b> FTIR spectra of chemosensor <b>H<sub>3</sub>L</b> .                                                                                                                                                                                                          | S6       |
| 7          | <b>Fig. S3</b> ESI-MS <sup>+</sup> spectrum of complex <b>1</b> , {[Al( <b>HL</b> )NO <sub>3</sub> +H] <sup>+</sup> }.                                                                                                                                                      | S7       |
| 8          | <b>Fig. S4</b> FTIR spectra of complex <b>1</b> .                                                                                                                                                                                                                           | S7       |
| 9          | <b>Fig. S5</b> <sup>1</sup> H NMR spectra of <b>H<sub>3</sub>L</b> in DMSO- <i>d</i> <sub>6</sub> solvent.                                                                                                                                                                  | S8       |
| 10         | <b>Fig. S6</b> <sup>1</sup> H NMR spectra of complex <b>1</b> in DMSO- <i>d</i> <sub>6</sub> solvent.                                                                                                                                                                       | S9       |
| 11         | <b>Fig. S7</b> <sup>13</sup> C NMR spectra of chemosensor <b>H<sub>3</sub>L</b> in DMSO- <i>d</i> <sub>6</sub> solvent.                                                                                                                                                     | S10      |
| 12         | <b>Fig. S8</b> <sup>13</sup> C NMR spectra of complex <b>1</b> in DMSO- <i>d</i> <sub>6</sub> solvent.                                                                                                                                                                      | S11      |
| 13         | <b>Fig. S9</b> <sup>1</sup> H NMR titration of the free ligand ( <b>H<sub>3</sub>L</b> ) and with the addition of 0.25,                                                                                                                                                     | S12      |

|    |                                                                                                                                                                                                                                              |         |
|----|----------------------------------------------------------------------------------------------------------------------------------------------------------------------------------------------------------------------------------------------|---------|
|    | 0.50 and 1 equivalent of Al <sup>3+</sup> in DMSO- <i>d</i> <sub>6</sub> solvent.                                                                                                                                                            |         |
| 14 | <b>Fig. S10</b> Binding constant calculation for <b>H<sub>3</sub>L</b> with Al <sup>3+</sup> in HEPES buffer at pH 7.4 (MeOH:H <sub>2</sub> O, 9:1, (v/v)).                                                                                  | S13     |
| 15 | <b>Fig. S11</b> Time-resolved fluorescence decay curves (logarithm of normalized intensity vs time in nS) of <b>H<sub>3</sub>L</b> in the absence (●) and presence (●) of Al <sup>3+</sup> ion, (●) indicates decay curve for the scattered. | S13     |
| 16 | <b>Fig. S12</b> Relative fluorescence intensity diagram of [ <b>H<sub>3</sub>L</b> -Al <sup>3+</sup> ] with different cations upon λ <sub>ex</sub> = 500 nm in HEPES buffer at pH 7.4 (MeOH:H <sub>2</sub> O, 9:1, (v/v)).                   | S14     |
| 17 | <b>Fig. S13</b> Relative fluorescence intensity diagram of <b>H<sub>3</sub>L</b> with of different anions upon λ <sub>ex</sub> = 500 nm in HEPES buffer at pH 7.4 (MeOH:H <sub>2</sub> O, 9:1, (v/v)).                                       | S15     |
| 18 | <b>Fig. S14</b> Relative fluorescence intensity diagram of [ <b>H<sub>3</sub>L</b> -Al <sup>3+</sup> ] with different anions upon λ <sub>ex</sub> = 500 nm in HEPES buffer at pH 7.4 (MeOH:H <sub>2</sub> O, 9:1, (v/v)).                    | S16     |
| 19 | <b>Fig. S15</b> Colour changes of chemosensor ( <b>H<sub>3</sub>L</b> ) (20μM) under UV and Visible light in HEPES buffer at pH 7.4 (MeOH:H <sub>2</sub> O, 9:1, (v/v)).                                                                     | S17     |
| 20 | <b>Fig. S16</b> Selected angle between two planes of chemosensor <b>H<sub>3</sub>L</b> .                                                                                                                                                     | S17     |
| 21 | <b>Fig. S17</b> Experimental and theoretical absorption spectra of complex <b>1</b> .                                                                                                                                                        | S18     |
| 22 | <b>Scheme S1</b> Synthesis route of complex <b>1</b> .                                                                                                                                                                                       | S19     |
| 23 | <b>Chart S1</b> Literature survey of rhodamine based metal ion sensors.                                                                                                                                                                      | S20-S23 |

**Table S1** Crystal parameters and selected refinement details for chemosensor **H<sub>3</sub>L**.

| <b>Chemosensor</b>                                          | <b>H<sub>3</sub>L</b> |                                                               |
|-------------------------------------------------------------|-----------------------|---------------------------------------------------------------|
| Empirical formula                                           |                       | C <sub>37</sub> H <sub>36</sub> N <sub>4</sub> O <sub>4</sub> |
| Formula weight                                              |                       | 600.70                                                        |
| Temperature (K)                                             |                       | 273(2)                                                        |
| Crystal system                                              |                       | Triclinic                                                     |
| Space group                                                 |                       | <i>P</i> -1                                                   |
| <i>a</i> (Å)                                                |                       | 9.3947(3)                                                     |
| <i>b</i> (Å)                                                |                       | 12.3486(3)                                                    |
| <i>c</i> (Å)                                                |                       | 14.4715(4)                                                    |
| $\alpha$ (°)                                                |                       | 94.1270(10)                                                   |
| $\beta$ (°)                                                 |                       | 103.7440(10)                                                  |
| $\gamma$ (°)                                                |                       | 94.6350(10)                                                   |
| Volume (Å <sup>3</sup> )                                    |                       | 1618.23(8)                                                    |
| <i>Z</i>                                                    |                       | 2                                                             |
| <i>D</i> <sub>calc</sub> (g cm <sup>-3</sup> )              |                       | 1.233                                                         |
| Absorption coefficient (mm <sup>-1</sup> )                  |                       | 0.081                                                         |
| <i>F</i> (000)                                              |                       | 636                                                           |
| $\theta$ Range for data collection (°)                      |                       | 1.662-27.127                                                  |
| Reflections collected                                       |                       | 52150                                                         |
| Independent reflection / <i>R</i> <sub>int</sub>            |                       | 5687/ 0.0419                                                  |
| Data / restraints / parameters                              |                       | 7140/0/406                                                    |
| Goodness-of-fit on <i>F</i> <sup>2</sup>                    |                       | 1.042                                                         |
| Final <i>R</i> indices [ <i>I</i> >2 $\sigma$ ( <i>I</i> )] |                       | <i>R</i> 1 = 0.0726, <i>wR</i> 2 =<br>0.2040                  |
| <i>R</i> indices (all data)                                 |                       | <i>R</i> 1 = 0.0876<br><i>wR</i> 2 = 0.2181                   |
| Largest diff. peak / hole (e Å <sup>-3</sup> )              |                       | 0.531/ -0.420                                                 |

**Table S2** Selected bond lengths (Å) and bond angles (°) for chemosensor **H<sub>3</sub>L**.

| Chemosensor <b>H<sub>3</sub>L</b> |          |             |            |
|-----------------------------------|----------|-------------|------------|
| N3-C10                            | 1.494(3) | C8-C10-C11  | 110.55(17) |
| N3-N4                             | 1.376(2) | C11-C10-C20 | 112.47(17) |
| N3-C26                            | 1.372(3) | N3-C10-C8   | 110.83(17) |
| C8-C10                            | 1.515(3) | N3-C10-C11  | 109.50(16) |
| C11-C10                           | 1.516(3) | N3-C10-C20  | 99.40(16)  |
| C20-C10                           | 1.518(3) | C26-N3-C10  | 115.33(17) |
| C26-O2                            | 1.214(3) | C26-N3-N4   | 129.50(18) |
|                                   |          | C27-N4-N3   | 121.37(19) |
|                                   |          | O2-C26-N3   | 126.4(2)   |

**Table S3** Apparent binding constant (K), LOD, lifetime ( $\tau_f$ ) and quantum yield ( $\Phi$ ) values of **H<sub>3</sub>L** and complex **1** from spectrofluorimetric measurement.

|                       | <b>K (M<sup>-1</sup>)</b> | <b>LOD (M)</b>         | $\tau_f$<br>(nS)<br>(average) | $\chi^2$  | $\Phi$ |
|-----------------------|---------------------------|------------------------|-------------------------------|-----------|--------|
| <b>H<sub>3</sub>L</b> | -                         |                        | 0.26                          | 0.990360  | 0.014  |
| <b>Complex 1</b>      | 2.01×10 <sup>5</sup>      | 2.82× 10 <sup>-6</sup> | 1.29                          | 0.9031072 | 0.065  |

**Table S4** First few strong and the lowest-lying absorption and emission band calculated wavelength (nm)/energies (eV), oscillator strength ( $f$ ), major contribution, and the experimental wavelength (nm) for the investigated complex **1** in methanol media.

|                          | Excited states | Energy (eV) | Wavelength (nm) | Osc. Strength ( $f$ ) | Major contributors    | Experimental Wavelength (nm) |
|--------------------------|----------------|-------------|-----------------|-----------------------|-----------------------|------------------------------|
| Absorption               |                |             |                 |                       |                       |                              |
|                          | S <sub>1</sub> | 2.1516      | 576             | 0.3120                | HOMO → LUMO (97.9%)   | 530                          |
|                          | S <sub>3</sub> | 2.9479      | 420             | 0.6588                | HOMO → LUMO +2 (94%)  |                              |
|                          | S <sub>9</sub> | 3.5893      | 345             | 0.2046                | HOMO-4 → LUMO (72.8%) | 350                          |
| Emission                 |                |             |                 |                       |                       |                              |
| Opened spiro lactam ring | S <sub>1</sub> | 2.4839      | 530             | 0.6441                | HOMO → LUMO+2 (86.8%) | 552                          |
| Closed spiro lactam ring | S <sub>1</sub> | 2.5548      | 485             | 0.0004                | HOMO-3 → LUMO (98.9%) | 552                          |

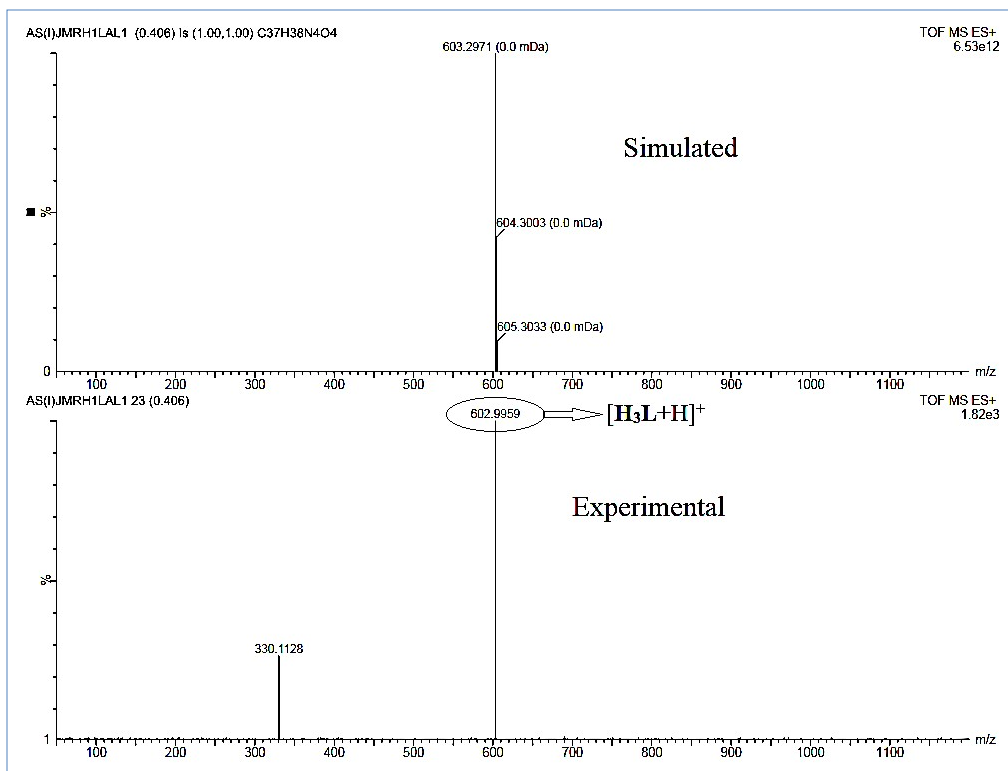

**Fig. S1** ESI-MS<sup>+</sup> spectrum of [H<sub>3</sub>L+H]<sup>+</sup>.

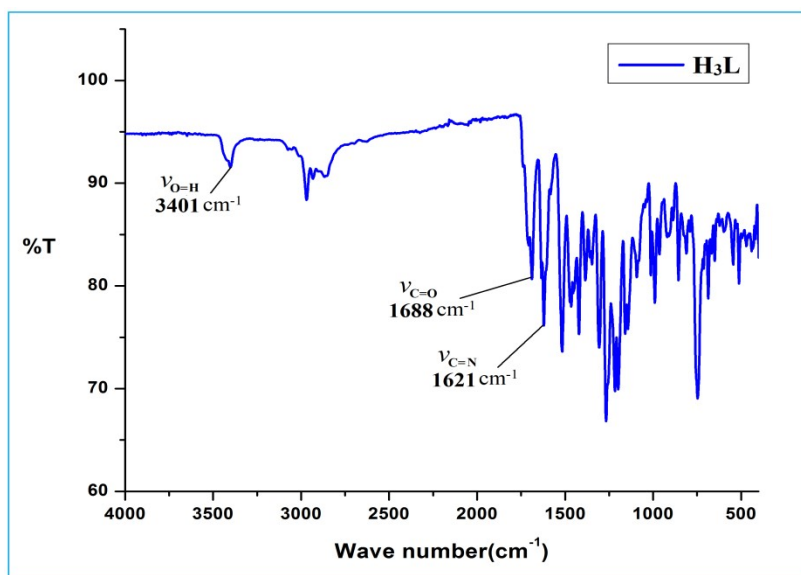

**Fig. S2** FT-IR spectra of chemosensor H<sub>3</sub>L.

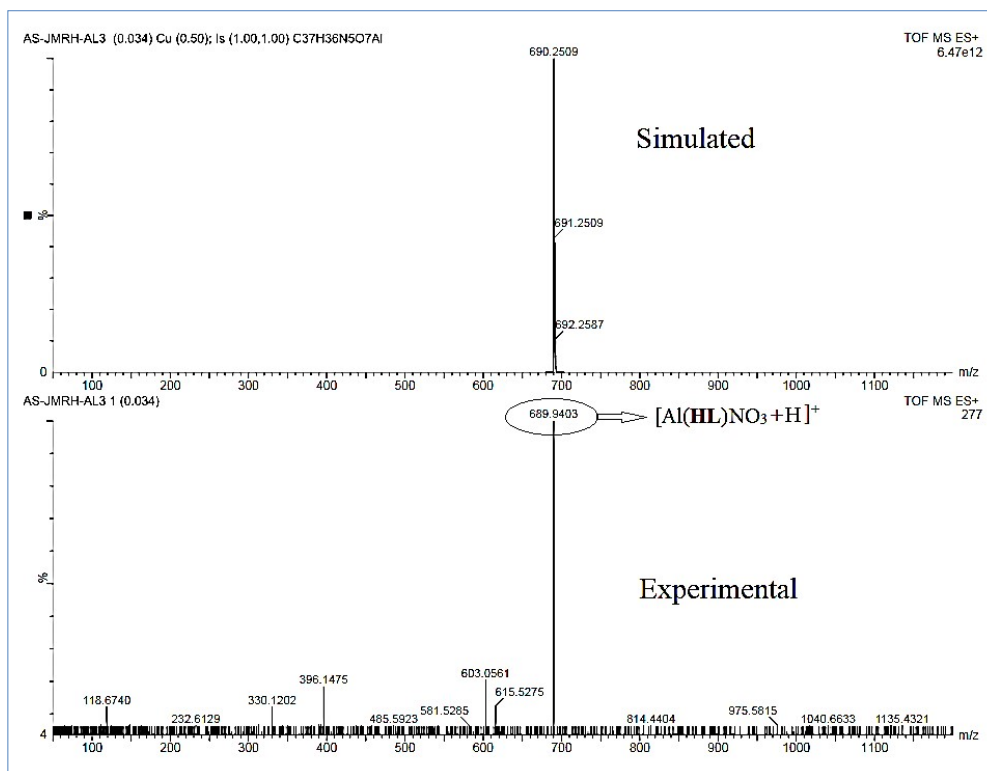

Fig. S3 ESI-MS<sup>+</sup> spectrum of complex 1,  $\{[Al(HL)NO_3+H]^+\}$ .

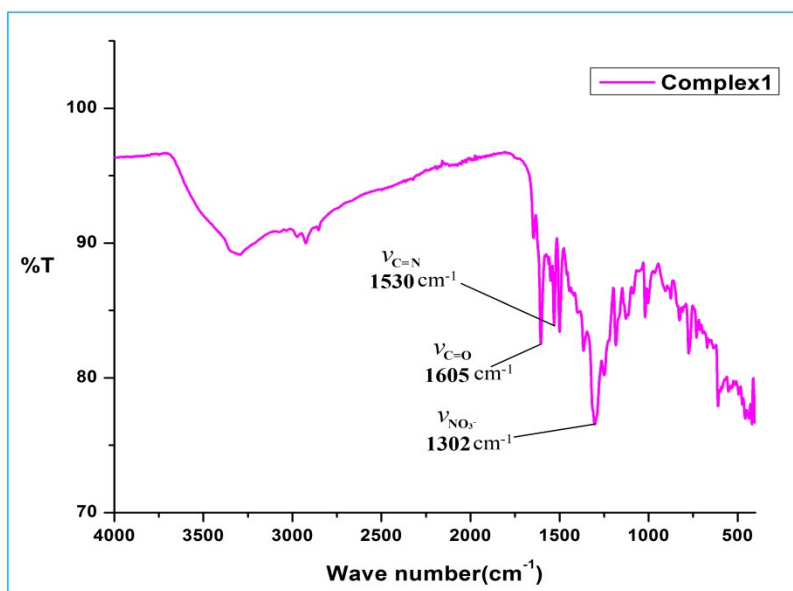

Fig. S4 FT-IR spectra of complex 1.

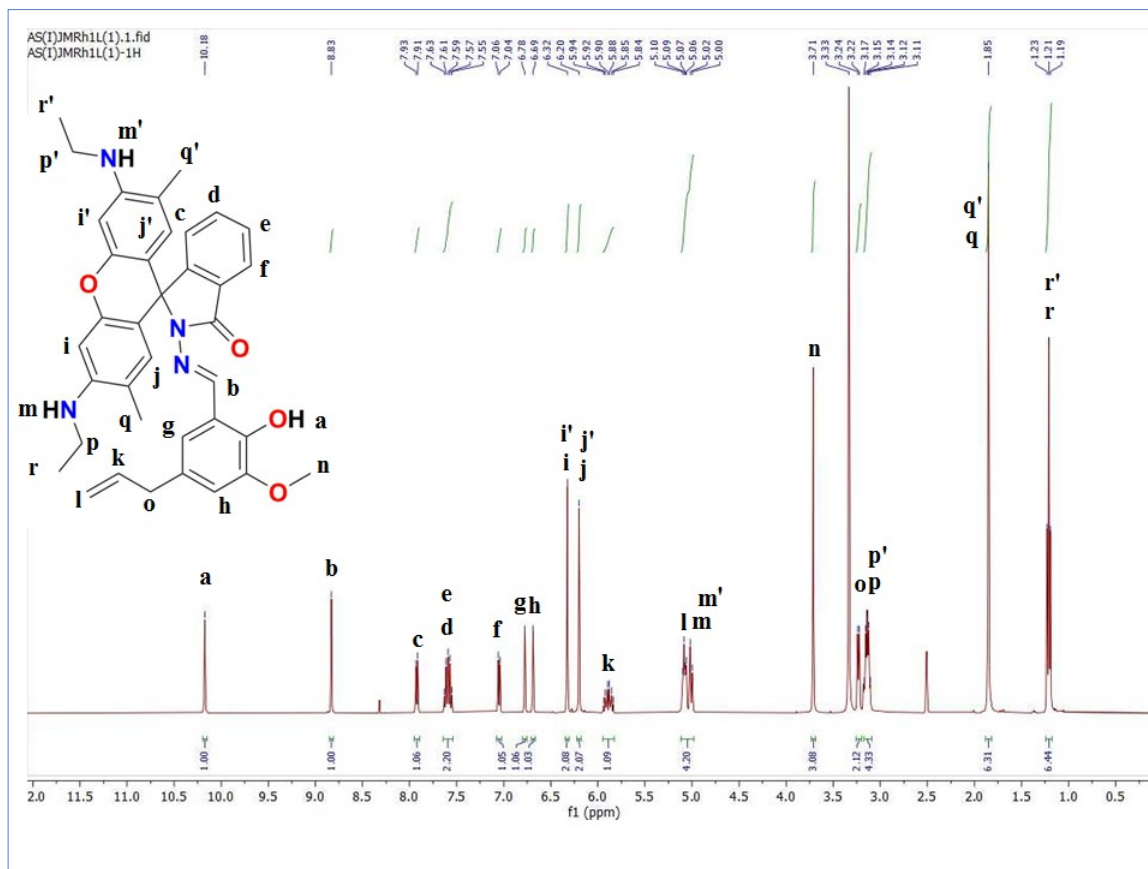

Fig. S5  $^1\text{H}$  NMR spectra of  $\text{H}_3\text{L}$  in  $\text{DMSO-}d_6$  solvent.



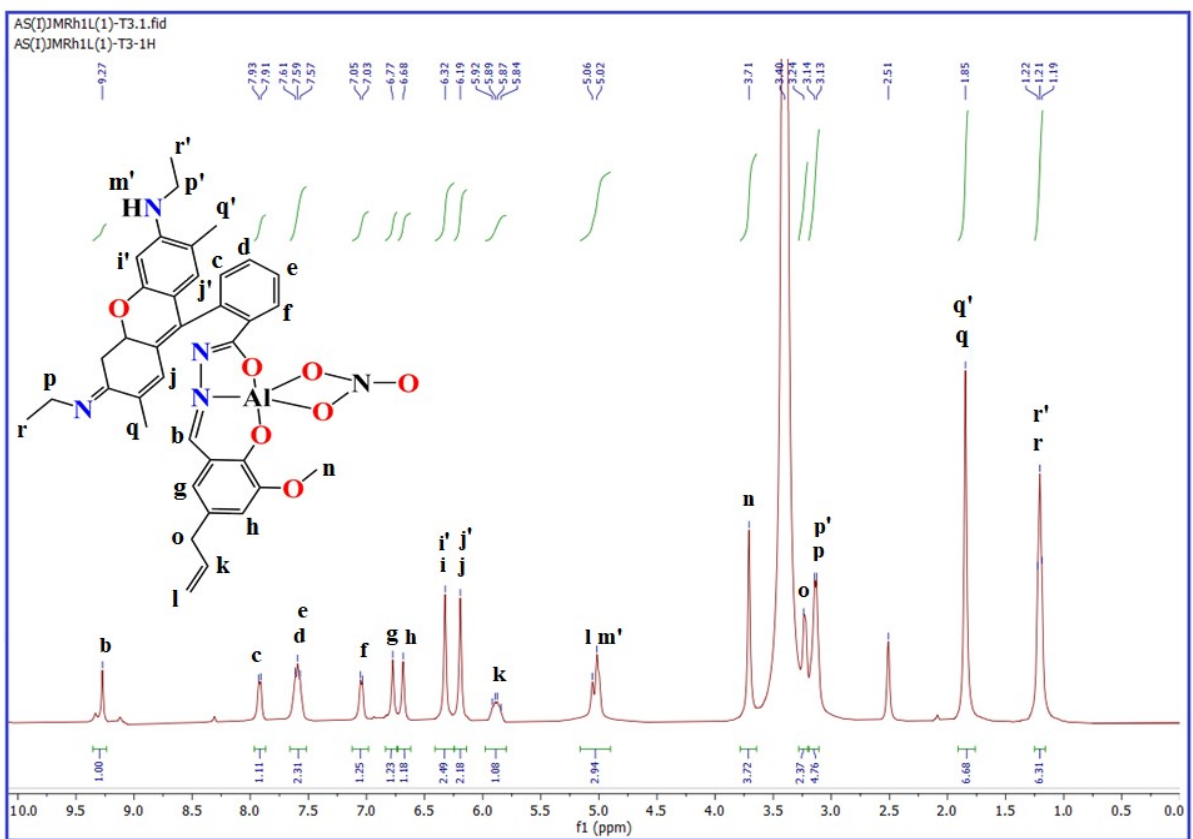

Fig. S6  $^1\text{H}$  NMR spectra of complex 1 in  $\text{DMSO-}d_6$  solvent.

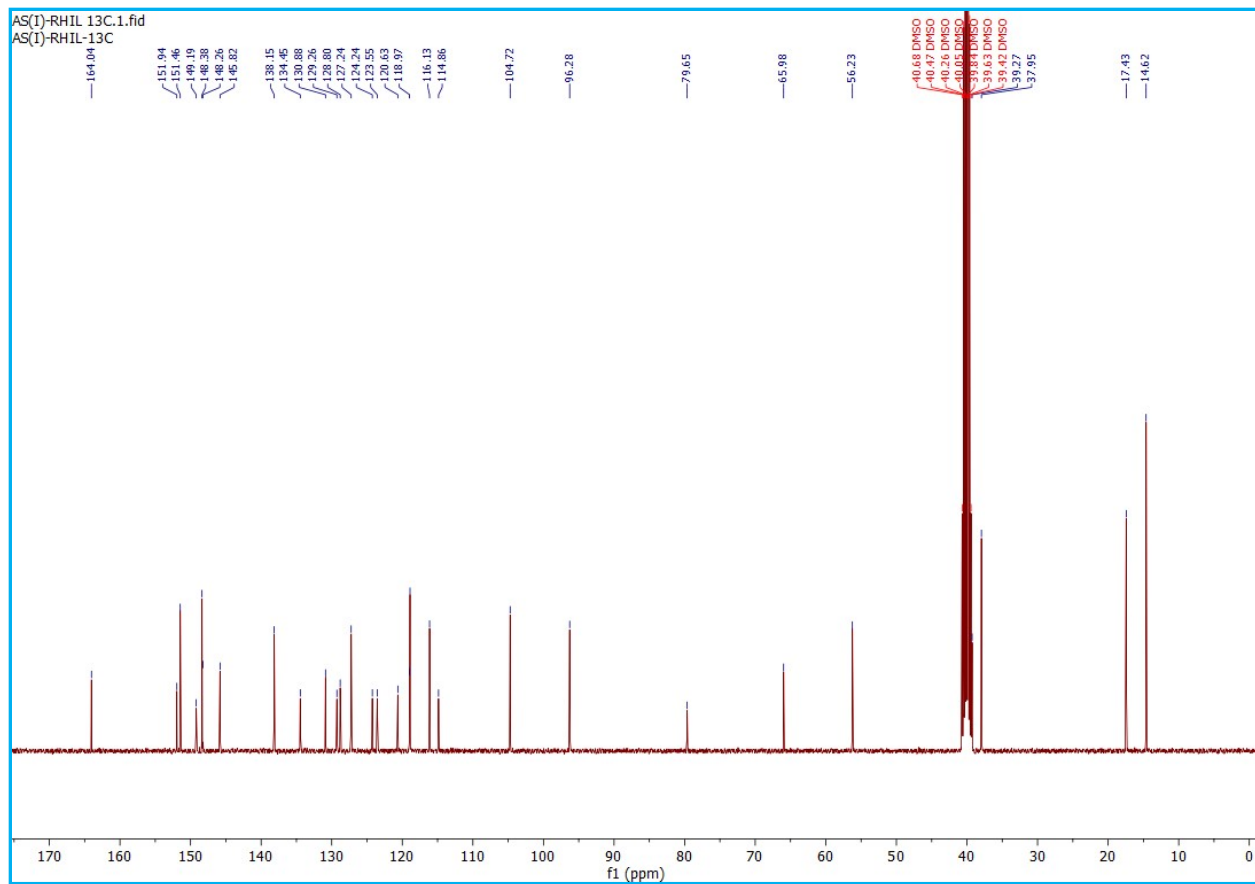

**Fig. S7**  $^{13}\text{C}$  NMR spectra of chemosensor **H<sub>3</sub>L** in  $\text{DMSO-}d_6$  solvent.

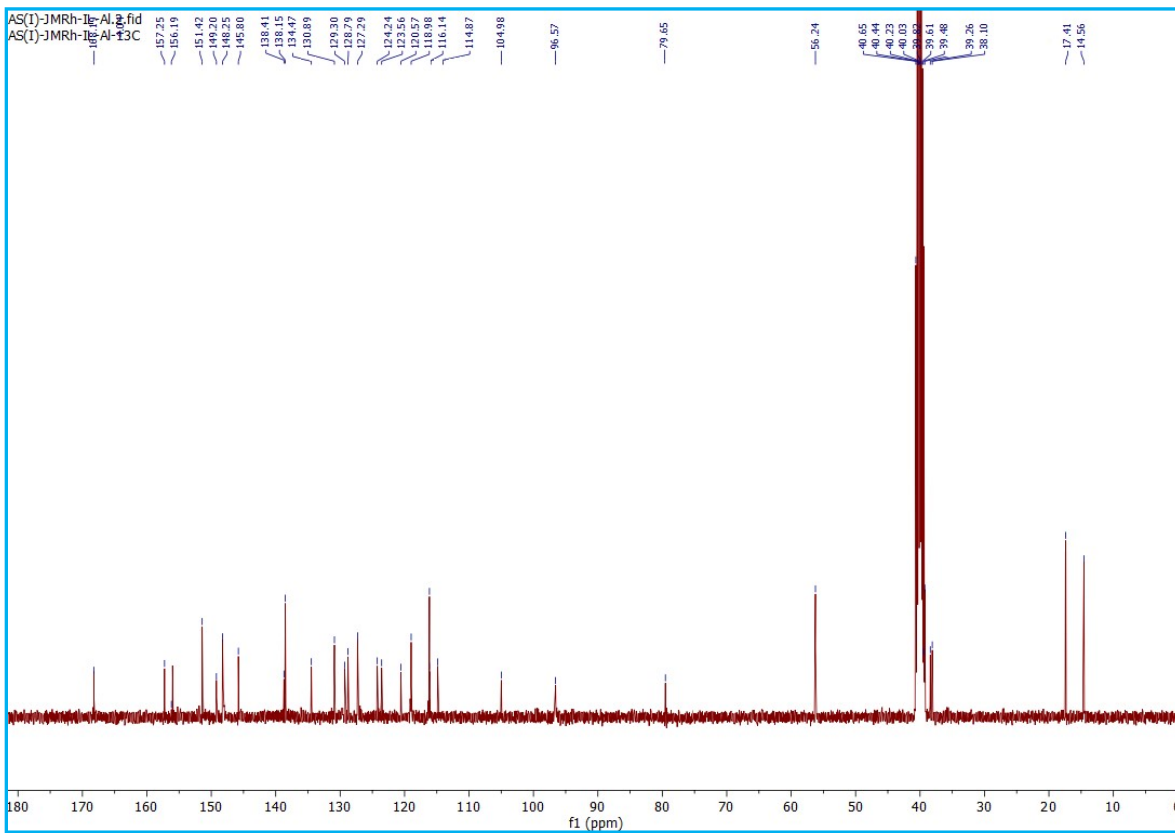

**Fig. S8**  $^{13}\text{C}$  NMR spectra of complex **1** in  $\text{DMSO-}d_6$  solvent.

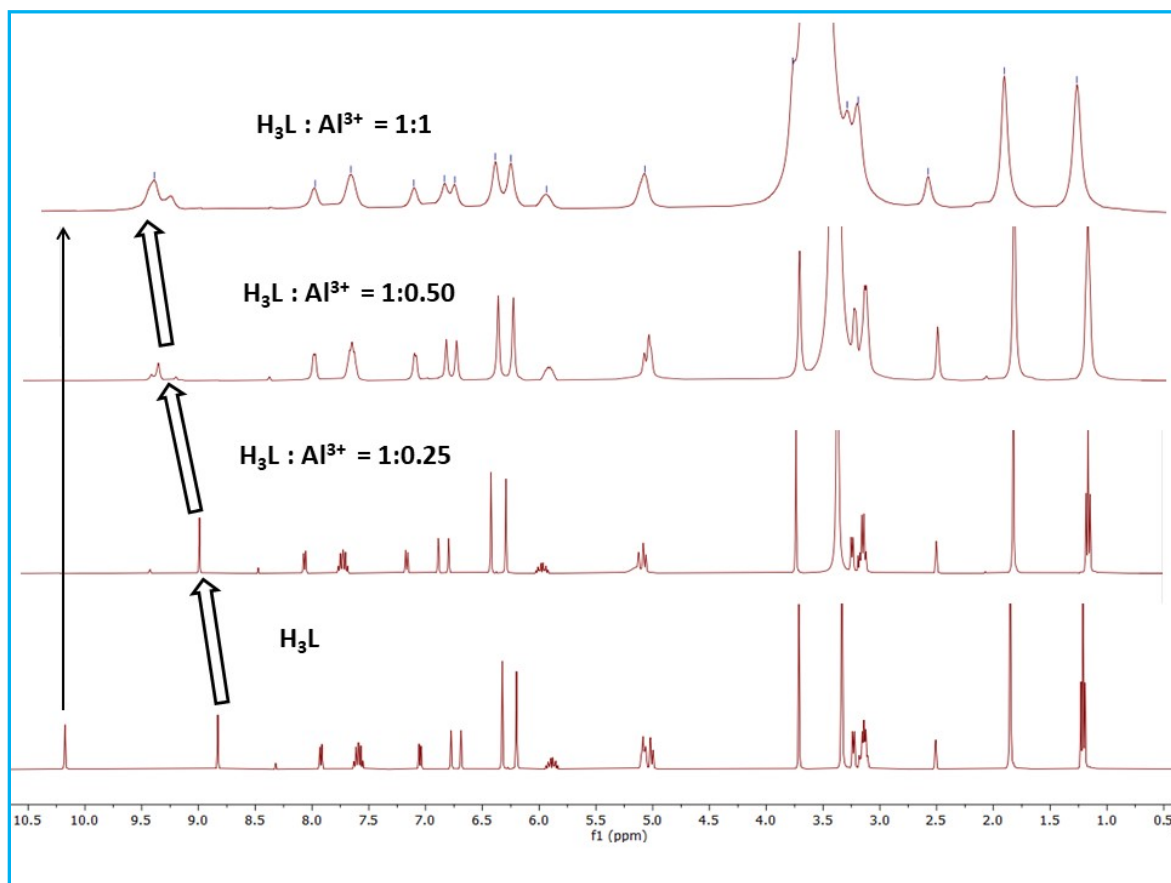

**Fig. S9**  $^1\text{H}$  NMR titration of the free ligand ( $\text{H}_3\text{L}$ ) and with the addition of 0.25, 0.50 and 1 equivalent of  $\text{Al}^{3+}$  in  $\text{DMSO}-d_6$  solvent.

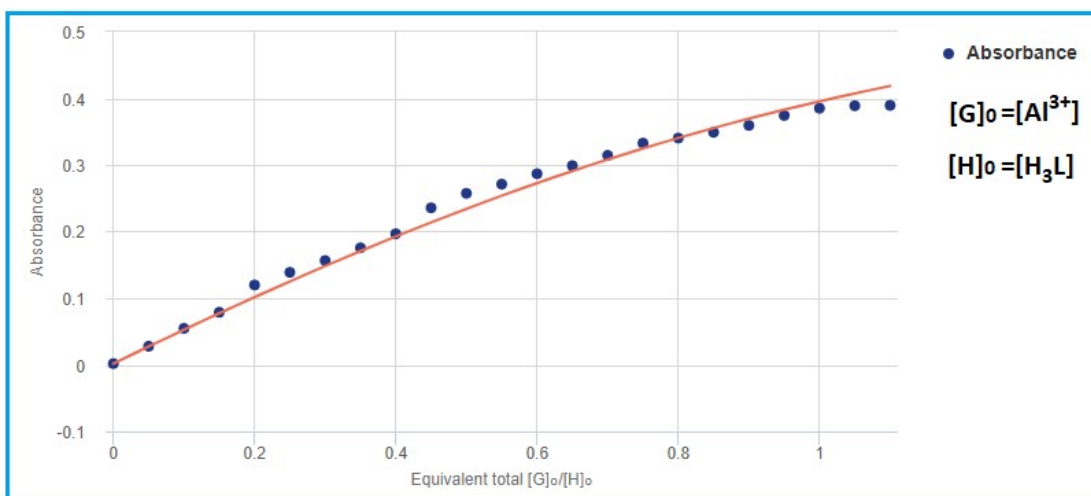

**Fig. S10** Binding constant calculation for  $\text{H}_3\text{L}$  with  $\text{Al}^{3+}$  in HEPES buffer at pH 7.4 (MeOH:H<sub>2</sub>O, 9:1, (v/v)). [<http://supramolecular.org>]. Binding constant =  $2.01 \times 10^5 \text{ M}^{-1}$ .

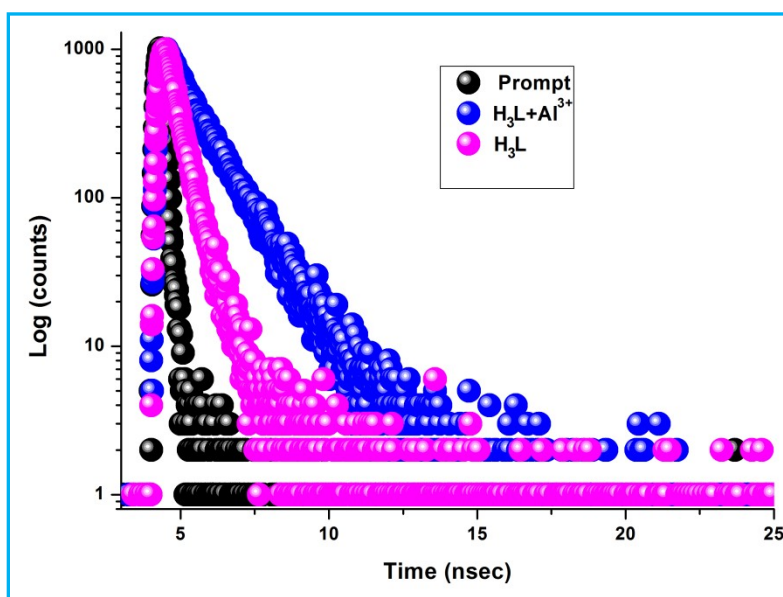

**Fig. S11** Time-resolved fluorescence decay curves (logarithm of normalized intensity vs time in nS) of  $\text{H}_3\text{L}$  in the absence (●) and presence (●) of  $\text{Al}^{3+}$  ion, (●) indicates decay curve for the scattered.

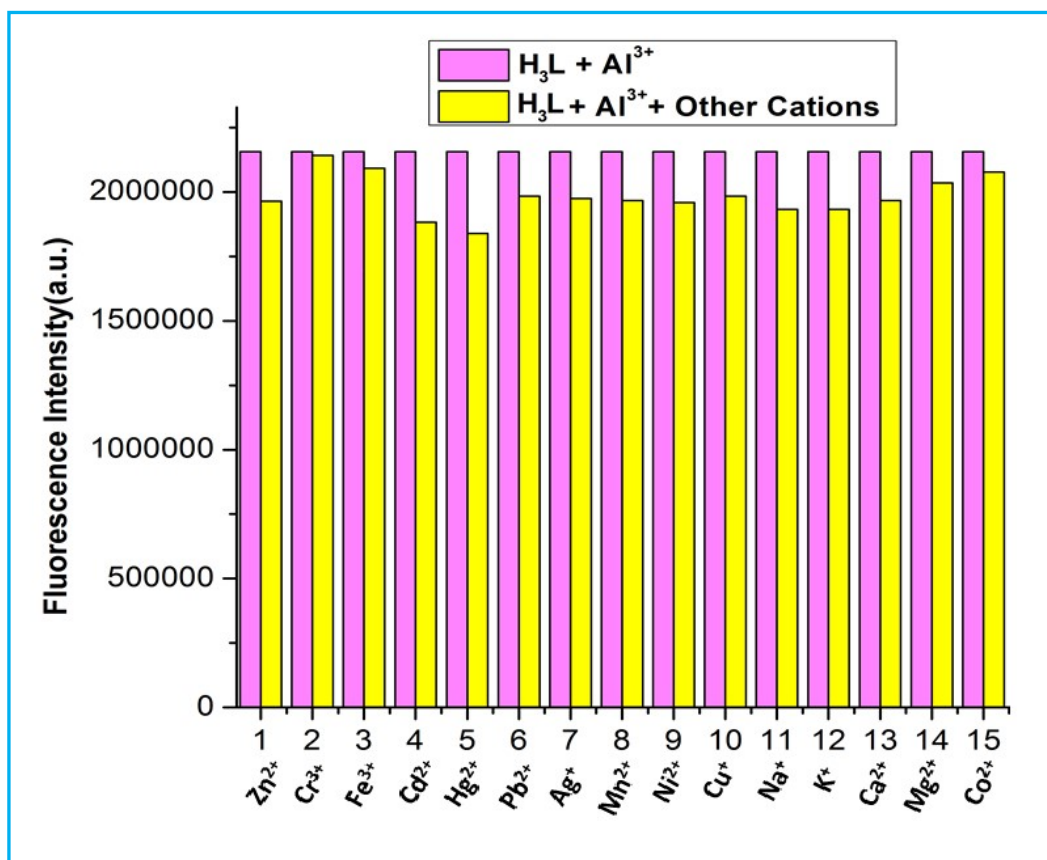

**Fig. S12** Relative fluorescence intensity diagram of  $[H_3L-Al^{3+}]$  with different cations upon  $\lambda_{ex}=500$  nm in HEPES buffer at pH 7.4 (MeOH:H<sub>2</sub>O, 9:1, (v/v)) where  $H_3L$  (20  $\mu$ M) +  $Al^{3+}$  (20  $\mu$ M) +  $M^{n+}$  (100  $\mu$ M) and  $M^{n+}=(1-Zn^{2+}, 2-Cr^{3+}, 3-Fe^{3+}, 4-Cd^{2+}, 5-Hg^{2+}, 6-Pb^{2+}, 7-Ag^+, 8-Mn^{2+}, 9-Ni^{2+}, 10-Cu^{2+}, 11-Na^+, 12-K^+, 13-Ca^{2+}, 14-Mg^{2+}$  and  $15-Co^{2+}$ , respectively).

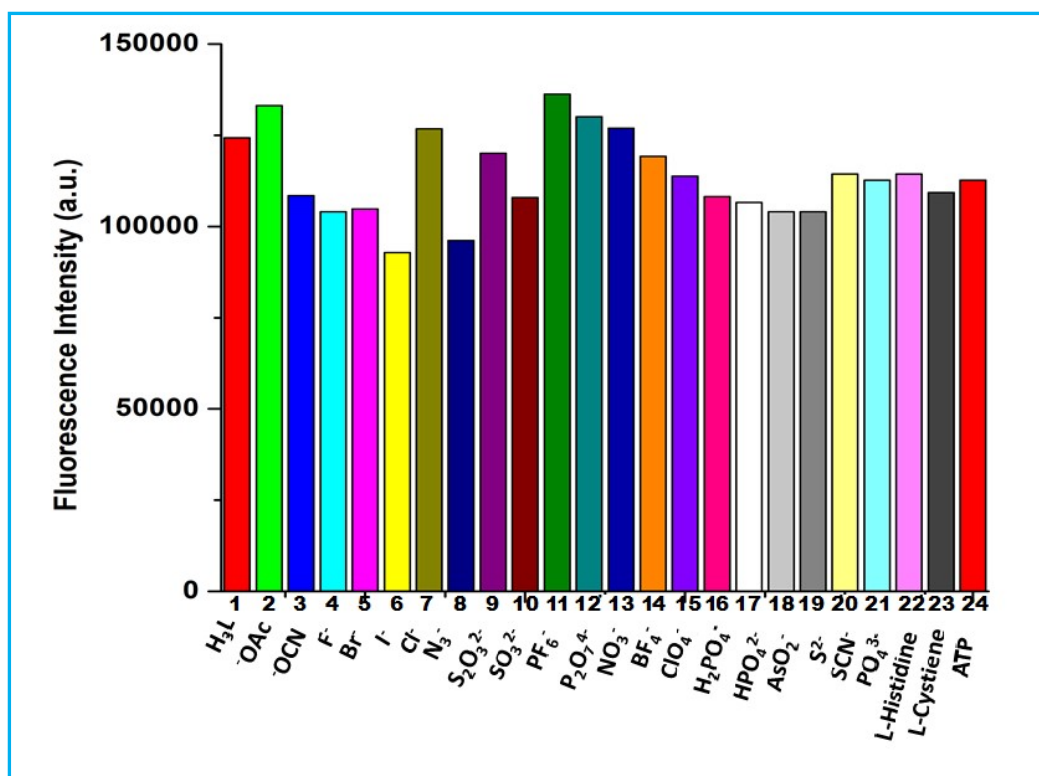

**Fig. S13** Relative fluorescence intensity diagram of **H<sub>3</sub>L** with of different anions upon  $\lambda_{\text{ex}} = 500$  nm in HEPES buffer at pH 7.4 (MeOH:H<sub>2</sub>O, 9:1, (v/v)). 1=only **H<sub>3</sub>L** (20  $\mu\text{M}$ ); 2-24= **H<sub>3</sub>L** (20  $\mu\text{M}$ ) +  $\text{M}^{\text{n}}$  (100  $\mu\text{M}$ ), where  $\text{M}^{\text{n}}$ = 2-AcO<sup>-</sup>, 3-OCN<sup>-</sup>, 4-F<sup>-</sup>, 5-Br<sup>-</sup>, 6-I<sup>-</sup>, 7-Cl<sup>-</sup>, 8-N<sub>3</sub><sup>-</sup>, 9-S<sub>2</sub>O<sub>3</sub><sup>2-</sup>, 10-SO<sub>3</sub><sup>2-</sup>, 11-PF<sub>6</sub><sup>-</sup>, 12-P<sub>2</sub>O<sub>7</sub><sup>4-</sup>, 13-NO<sub>3</sub><sup>-</sup>, 14-BF<sub>4</sub><sup>-</sup>, 15-ClO<sub>4</sub><sup>-</sup>, 16-H<sub>2</sub>PO<sub>4</sub><sup>-</sup>, 17-HPO<sub>4</sub><sup>2-</sup>, 18-AsO<sub>2</sub><sup>-</sup>, 19-S<sup>2-</sup>, 20-SCN<sup>-</sup>, 21-PO<sub>4</sub><sup>3-</sup>, 22-L-Histidine, 23-L-Cystiene and 24-ATP, respectively.

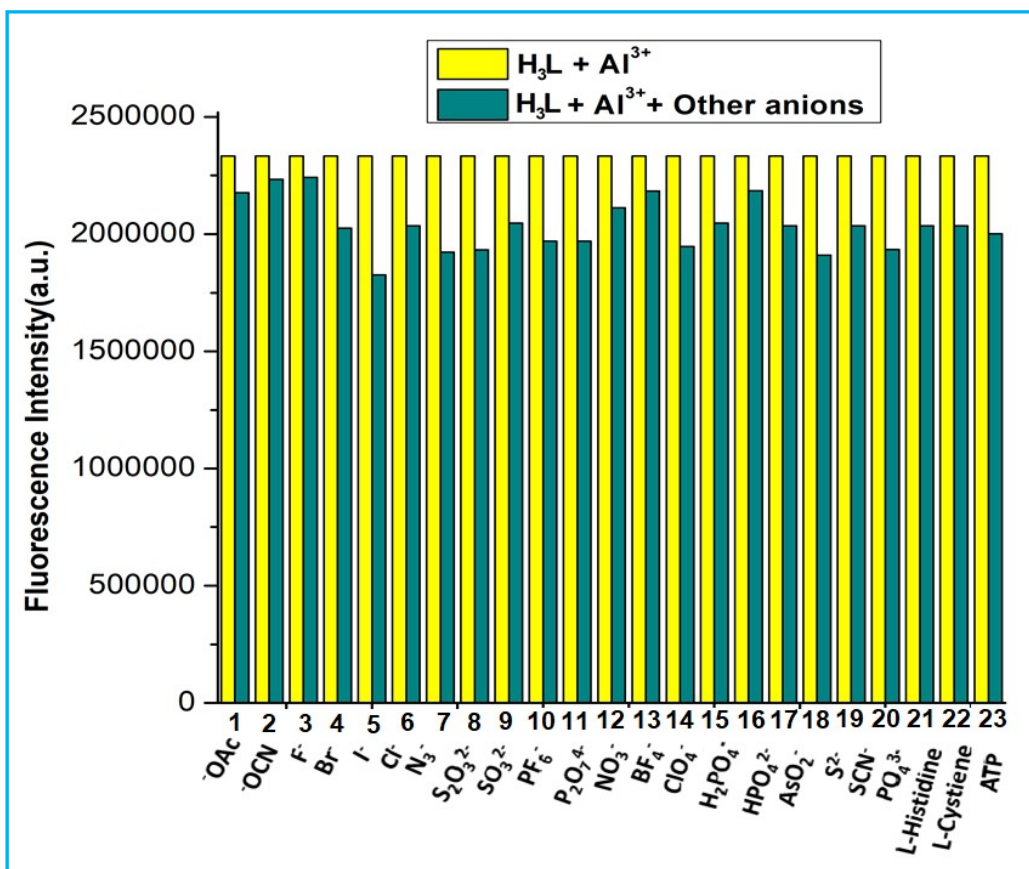

**Fig. S14** Relative fluorescence intensity diagram of  $[\text{H}_3\text{L}-\text{Al}^{3+}]$  with different anions upon  $\lambda_{\text{ex}}=500$  nm in HEPES buffer at pH 7.4 (MeOH:H<sub>2</sub>O, 9:1, (v/v)) where  $\text{H}_3\text{L}$  (20  $\mu\text{M}$ ) +  $\text{Al}^{3+}$  (20  $\mu\text{M}$ ) +  $\text{M}^n$  (100  $\mu\text{M}$ ) and  $\text{M}^n=$  1-AcO<sup>-</sup>, 2-OCN<sup>-</sup>, 3-F<sup>-</sup>, 4-Br<sup>-</sup>, 5-I<sup>-</sup>, 6-Cl<sup>-</sup>, 7-N<sub>3</sub><sup>-</sup>, 8-S<sub>2</sub>O<sub>3</sub><sup>2-</sup>, 9-SO<sub>3</sub><sup>2-</sup>, 10-PF<sub>6</sub><sup>-</sup>, 11-P<sub>2</sub>O<sub>7</sub><sup>2-</sup>, 12-NO<sub>3</sub><sup>-</sup>, 13-BF<sub>4</sub><sup>-</sup>, 14-ClO<sub>4</sub><sup>-</sup>, 15-H<sub>2</sub>PO<sub>4</sub><sup>-</sup>, 16-HPO<sub>4</sub><sup>2-</sup>, 17-AsO<sub>2</sub><sup>-</sup>, 18-S<sup>2-</sup>, 19-SCN<sup>-</sup>, 20-PO<sub>4</sub><sup>3-</sup>, 21-L-Histidine, 22-L-Cystiene and 23-ATP, respectively.



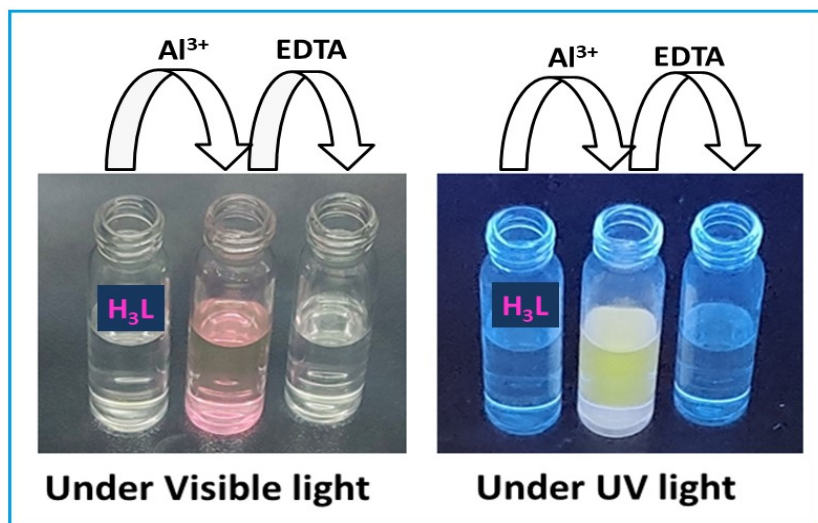

**Fig. S15** Colour changes of chemosensor ( $\text{H}_3\text{L}$ ) ( $20\mu\text{M}$ ) under UV and Visible light in HEPES buffer at pH 7.4 (MeOH:H<sub>2</sub>O, 9:1, (v/v)).

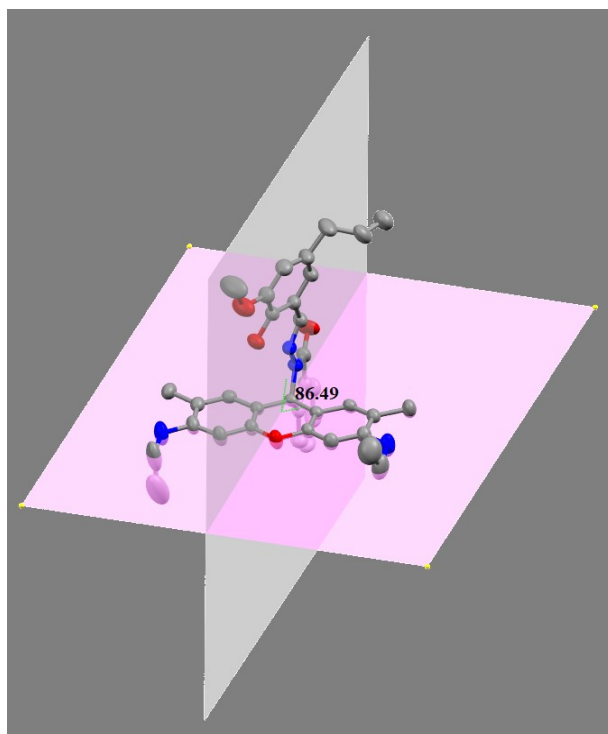

**Fig. S16** Selected angle between two planes of chemosensor  $\text{H}_3\text{L}$ .

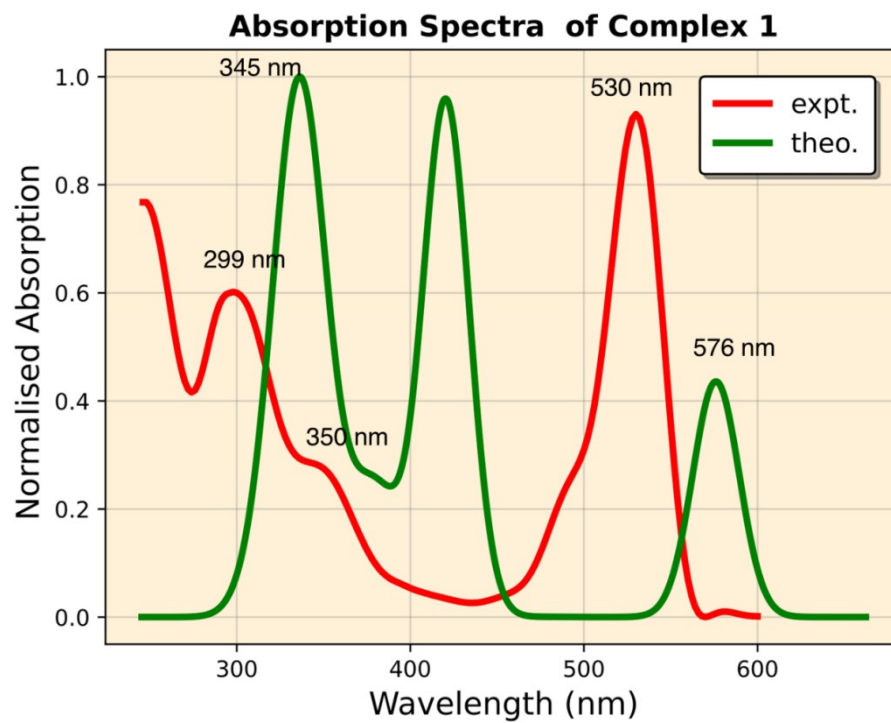

**Fig. S17** Experimental and theoretical absorption spectra of complex **1**.

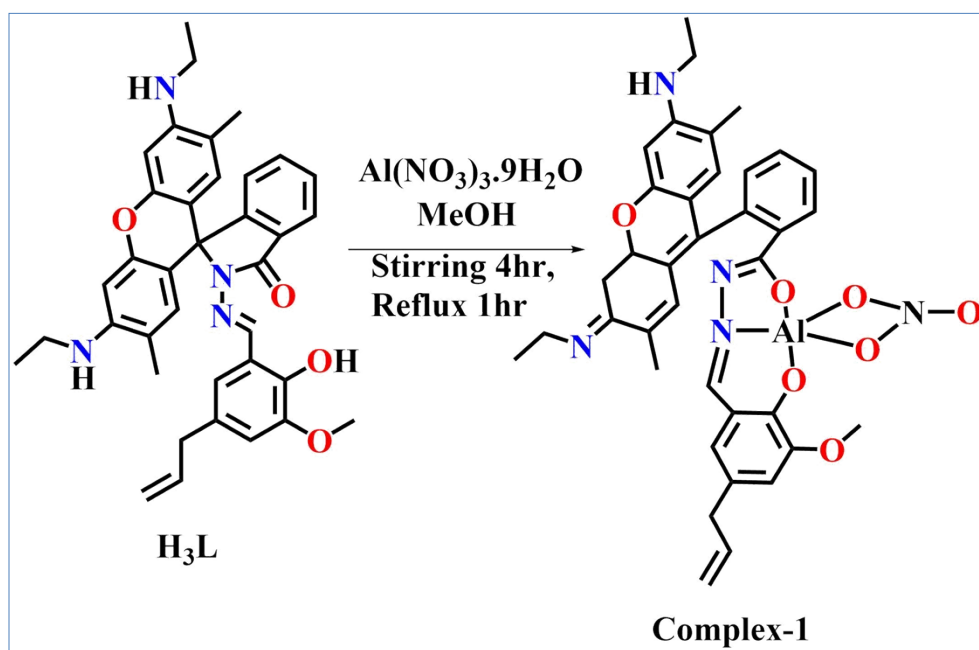

**Scheme S1** Synthesis route of complex 1.

**Chart S1** Literature survey of rhodamine based metal ion sensors.

| Sl. No. | Probe                                                                               | Sensing metal                                                                | Solvent used                                                                  | Excitation/ Emission (nm)                | Limit of detection (LOD) (M)                                                                                                                                                                       | Binding constant (M <sup>-1</sup> )                                                                                                                                                                                | Fluorescent intensity enhancement | Crystal structure | Biological study | Refs.      |
|---------|-------------------------------------------------------------------------------------|------------------------------------------------------------------------------|-------------------------------------------------------------------------------|------------------------------------------|----------------------------------------------------------------------------------------------------------------------------------------------------------------------------------------------------|--------------------------------------------------------------------------------------------------------------------------------------------------------------------------------------------------------------------|-----------------------------------|-------------------|------------------|------------|
| 1.      | 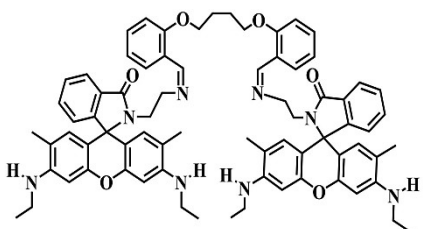   | Fe <sup>3+</sup><br>Al <sup>3+</sup><br>Cr <sup>3+</sup>                     | H <sub>2</sub> O/CH <sub>3</sub> CN<br>(7 : 3, v/v,<br>pH 7.2)                | 502/558                                  | 2.57 × 10 <sup>-6</sup><br>0.78 × 10 <sup>-6</sup><br>0.47 × 10 <sup>-6</sup>                                                                                                                      | K <sub>d</sub> =<br>1.94 × 10 <sup>-5</sup><br>3.15 × 10 <sup>-5</sup><br>2.26 × 10 <sup>-5</sup>                                                                                                                  | 669<br>653<br>667                 | No                | None             | <b>31a</b> |
| 2.      |   | Al <sup>3+</sup><br>Cr <sup>3+</sup><br>Fe <sup>3+</sup>                     | Britton–Robinson buffer solution<br>(H <sub>2</sub> O/MeOH 1 : 9 v/v; pH 7.4) | 525/555                                  | For R=H<br>2.86 × 10 <sup>-8</sup><br>2.67 × 10 <sup>-8</sup><br>5.62 × 10 <sup>-6</sup><br>For R=CH <sub>3</sub><br>2.78 × 10 <sup>-8</sup><br>2.61 × 10 <sup>-8</sup><br>6.14 × 10 <sup>-6</sup> | For R=H<br>(M <sup>-2</sup> )<br>5.14 × 10 <sup>5</sup><br>4.91 × 10 <sup>5</sup><br>3.37 × 10 <sup>4</sup><br>For R=CH <sub>3</sub><br>5.03 × 10 <sup>5</sup><br>4.86 × 10 <sup>5</sup><br>3.95 × 10 <sup>4</sup> | 400<br>400<br>100                 | Yes               | Cell imaging     | <b>31b</b> |
| 3.      |  | Al <sup>3+</sup><br>Ga <sup>3+</sup><br>In <sup>3+</sup><br>Tl <sup>3+</sup> | 10 mM HEPES buffer in<br>(1:9, v/v)<br>H <sub>2</sub> O:EtOH<br>(pH =7.4)     | 530/555<br>530/553<br>530/553<br>530/558 | 2.66 × 10 <sup>-8</sup><br>10.40 × 10 <sup>-8</sup><br>8.19 × 10 <sup>-8</sup><br>3.10 × 10 <sup>-8</sup>                                                                                          | 5.01 × 10 <sup>4</sup><br>4.79 × 10 <sup>4</sup><br>4.57 × 10 <sup>4</sup><br>5.75 × 10 <sup>4</sup>                                                                                                               | 96<br>26<br>32<br>80              | No                | None             | <b>31c</b> |

|    |                                                                                     |                                                                       |                                                                                    |                               |                                                                               |                                                                            |                   |     |                 |            |
|----|-------------------------------------------------------------------------------------|-----------------------------------------------------------------------|------------------------------------------------------------------------------------|-------------------------------|-------------------------------------------------------------------------------|----------------------------------------------------------------------------|-------------------|-----|-----------------|------------|
| 4. | 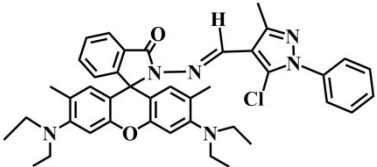   | Al <sup>3+</sup><br>Fe <sup>3+</sup><br>Cr <sup>3+</sup>              | HEPES<br>buffer at pH<br>7.4 in H <sub>2</sub> O/<br>MeOH (9:1,<br>v/v)            | 510/575                       | 1.74 × 10 <sup>-5</sup><br>1.86 × 10 <sup>-5</sup><br>3.45 × 10 <sup>-5</sup> | 1.44 × 10 <sup>6</sup><br>1.52 × 10 <sup>6</sup><br>4.01 × 10 <sup>7</sup> | ~10<br>~8<br>~4   | Yes | Cell<br>imaging | <b>31d</b> |
| 5. |    | Cr <sup>3+</sup>                                                      | 10 mM,<br>CH <sub>3</sub> CN–PBS<br>(9 : 1<br>v/v, pH =<br>7.4)                    | 531/558                       | 0.21 × 10 <sup>-6</sup>                                                       | 1.56 × 10 <sup>4</sup>                                                     | ~7                | Yes | None            | <b>31e</b> |
| 6. |    | Al <sup>3+</sup><br>Cr <sup>3+</sup><br>HSO <sub>4</sub> <sup>-</sup> | H <sub>2</sub> O-CH <sub>3</sub> CN<br>(1:9, v/v)                                  | 500/585<br>500/583<br>500/587 | 2.20 × 10 <sup>-8</sup><br>2.12 × 10 <sup>-8</sup><br>8.63 × 10 <sup>-7</sup> | 1.79 × 10 <sup>5</sup><br>1.79 × 10 <sup>4</sup>                           | 341<br>292<br>136 | No  | Cell<br>imaging | <b>31f</b> |
| 7. |  | Cu <sup>2+</sup>                                                      | 1 mM PBS<br>buffer in an<br>CH <sub>3</sub> CN /PBS<br>(v/v, 1 :1%)<br>at pH = 7.4 | 510/550                       | 3.58 × 10 <sup>-8</sup>                                                       | 0.2 × 10 <sup>-5</sup>                                                     | 28                | No  | Cell<br>imaging | <b>31g</b> |

|     |                                                                                     |                                                                                     |                                                                  |                                                 |                                                                                                                     |                                                                                                      |           |     |              |     |
|-----|-------------------------------------------------------------------------------------|-------------------------------------------------------------------------------------|------------------------------------------------------------------|-------------------------------------------------|---------------------------------------------------------------------------------------------------------------------|------------------------------------------------------------------------------------------------------|-----------|-----|--------------|-----|
| 8.  | 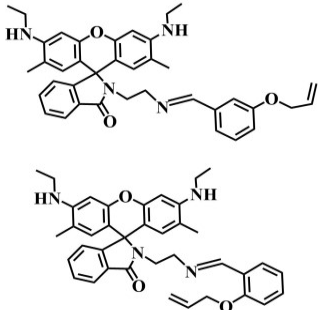   | Al <sup>3+</sup>                                                                    | 10 mM HEPES buffer in H <sub>2</sub> O/EtOH = 1:9 (v/v) (pH 7.4) | 530/553                                         | 1.11 × 10 <sup>-9</sup><br>1.05 × 10 <sup>-9</sup>                                                                  | 3.98 × 10 <sup>4</sup><br>1.09 × 10 <sup>4</sup>                                                     | 145<br>52 | No  | Cell imaging | 31h |
| 9.  |    | Fe <sup>3+</sup><br>Al <sup>3+</sup><br>Cr <sup>3+</sup><br>and<br>Hg <sup>2+</sup> | EtOH/H <sub>2</sub> O (4/1, v/v) HEPES, pH = 7.4)                | 559/582<br>559/582<br>559/582<br>and<br>555/578 | 10.20 × 10 <sup>-9</sup><br>14.66 × 10 <sup>-9</sup><br>58.78 × 10 <sup>-9</sup><br>and<br>73.33 × 10 <sup>-9</sup> | 5.78 × 10 <sup>5</sup><br>7.07 × 10 <sup>5</sup><br>4.10 × 10 <sup>5</sup><br>3.97 × 10 <sup>5</sup> | ~15       | No  | Cell imaging | 31i |
| 10. |   | Al <sup>3+</sup><br>Fe <sup>3+</sup>                                                | EtOH                                                             | 530/560                                         | 0.76 × 10 <sup>-9</sup><br>0.49 × 10 <sup>-9</sup>                                                                  | ---                                                                                                  | >900      | Yes | Cell imaging | 31j |
| 11. |  | Fe <sup>3+</sup>                                                                    | H <sub>2</sub> O (pH 7.2, 10 mM HEPES buffer)                    | 510/551                                         | 4.184 × 10 <sup>-6</sup>                                                                                            | (1.16 ± 0.04) × 10 <sup>4</sup>                                                                      | 14        | No  | Cell imaging | 31k |

|     |                                                                                   |                  |                                                                              |         |                       |                    |     |     |                 |              |
|-----|-----------------------------------------------------------------------------------|------------------|------------------------------------------------------------------------------|---------|-----------------------|--------------------|-----|-----|-----------------|--------------|
| 12. | 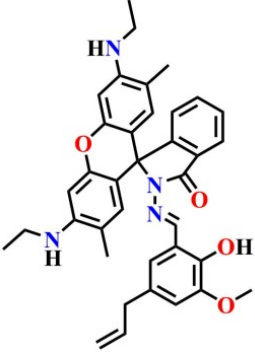 | Al <sup>3+</sup> | <p>HEPES<br/>buffer (9:1,<br/>MeOH:<br/>H<sub>2</sub>O, v/v,<br/>pH 7.4)</p> | 500/552 | $2.82 \times 10^{-6}$ | $2.01 \times 10^5$ | 138 | Yes | Cell<br>imaging | This<br>work |
|-----|-----------------------------------------------------------------------------------|------------------|------------------------------------------------------------------------------|---------|-----------------------|--------------------|-----|-----|-----------------|--------------|
